# Supplementary material for: Effects of Beraprost with or without NOS Inhibition on Plasma Aldosterone and Hemodynamics in Healthy Cats
Source: MDPI journal article supplement (doi:10.3390/vetsci11040155), 2024-03-30
Supplement: s1 [file s1]

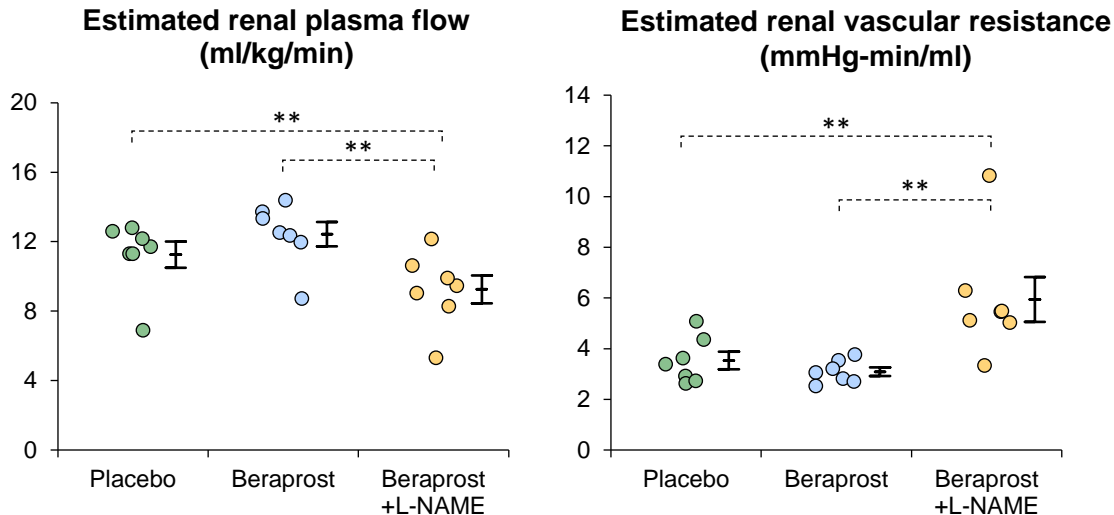

**Figure S1.** Comparison of estimated renal plasma flow and renal vascular resistance in cats administered placebo, beraprost, and beraprost combined with L-NAME (NOS inhibitor). Data represent dot plots for each phase (dot color), mean  $\pm$  SE of seven cats \*  $p < 0.05$ , \*\*  $p < 0.01$  by one-way repeated measures ANOVA followed by Holm–Bonferroni-corrected t test.
